# Supplementary material
Source: PubMed Central journal article supplement (PMC2781500)
Supplement: supp_M109.050443_jbc.M109.050443-3.pdf [file supp_M109.050443_jbc.M109.050443-3.pdf]

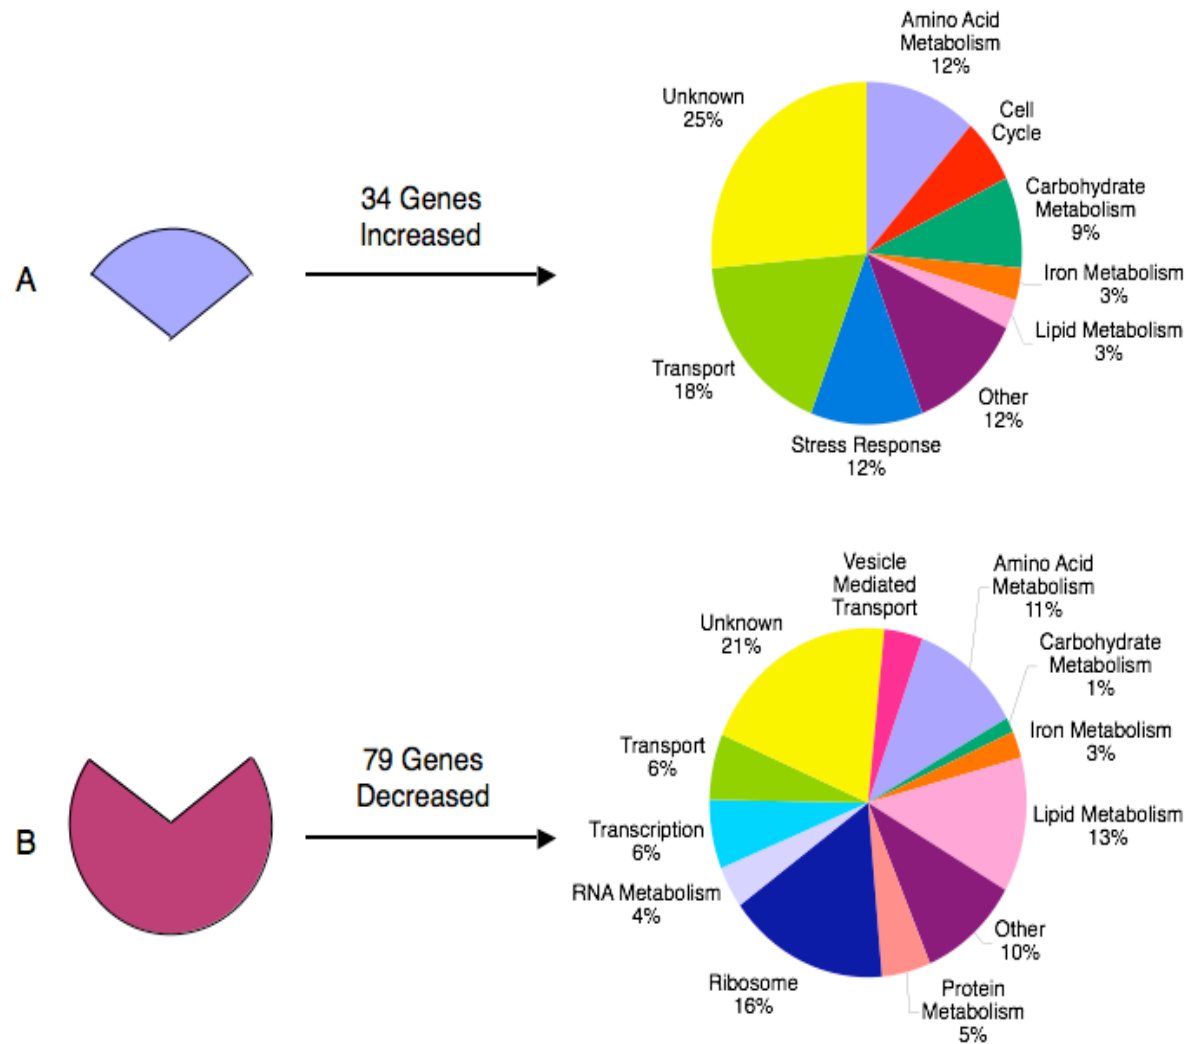

Supplementary Figure S2. Global expression changes in response to oleate. Schematic representing transcript levels in *are1Δ are2Δ dga1Δ lro1Δ* relative to control strains after a 6 hour exposure to 0.01mM oleate. Up-regulated (A) and down-regulated (B) genes are categorized by gene ontology.
