# Supplementary material
Source: PubMed Central journal article supplement (PMC2781500)
Supplement: supp_M109.050443_jbc.M109.050443-4.pdf [file supp_M109.050443_jbc.M109.050443-4.pdf]

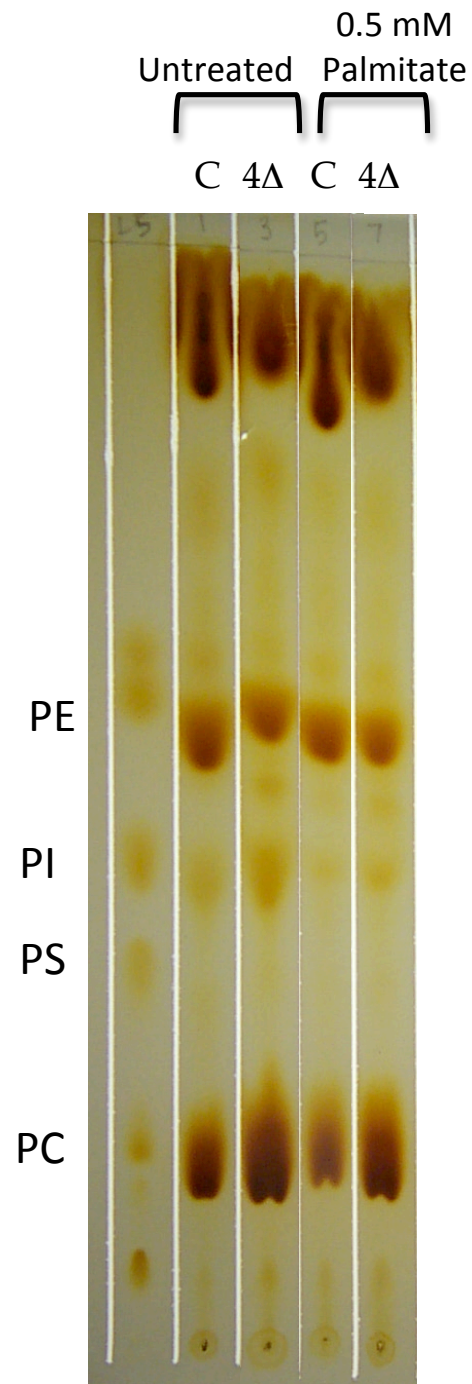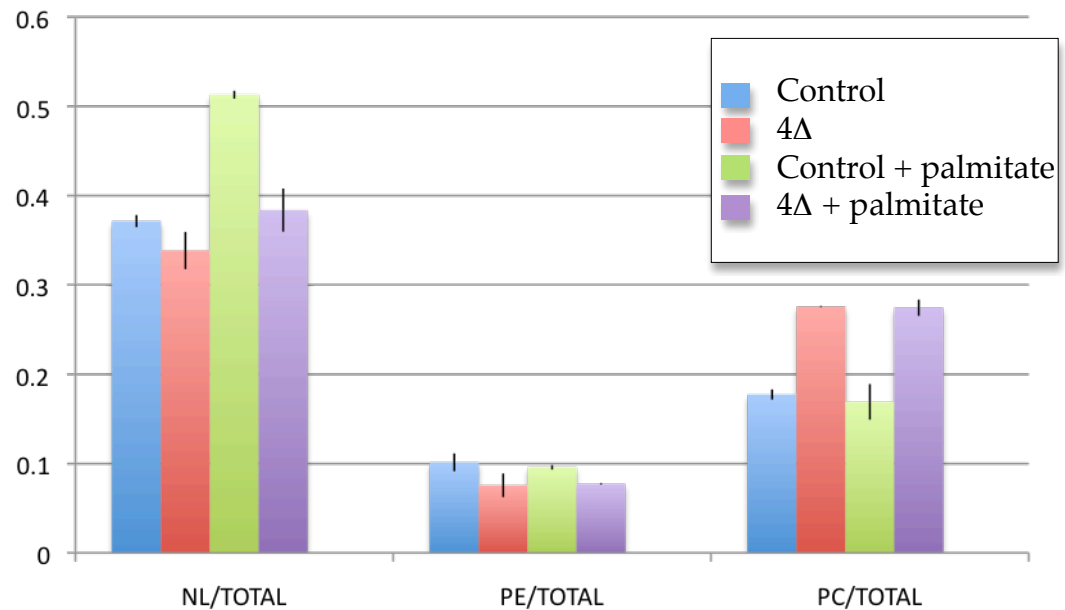

**Supplementary Figure S3.** Phospholipid composition of control (C) and Neutral lipid deficient (4Δ) strains. Lipids were extracted and resolved as described in experimental procedures and stained with Iodine. PE and PE represent phosphatidylethanolamine and phosphatidylcholine, respectively.
