# Supplementary material
Source: PubMed Central journal article supplement (PMC2781500)
Supplement: supp_M109.050443_jbc.M109.050443-5.pdf [file supp_M109.050443_jbc.M109.050443-5.pdf]

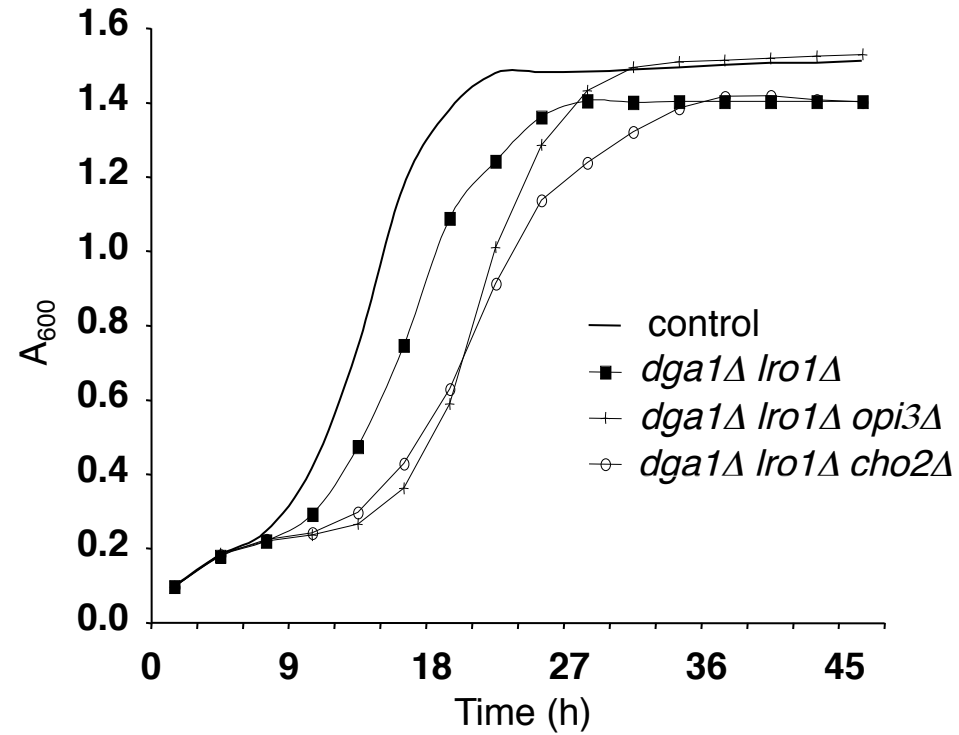

Figure S4. Growth curve analysis of strains combining lesions in the PE methylation and neutral lipid biosynthetic pathways, grown in YPD plus 0.5mM palmitate.
