# Supplementary material
Source: PubMed Central journal article supplement (PMC2781500)
Supplement: supp_M109.050443_jbc.M109.050443-6.pdf [file supp_M109.050443_jbc.M109.050443-6.pdf]

**Supplementary Table S1.** Yeast strains used in this study. Relevant genotypes are shown.

| <b>W303-1A</b>                    |                                                        |
|-----------------------------------|--------------------------------------------------------|
| SCY 325                           | normal                                                 |
| SCY 910                           | <i>are1Δ::HIS3 are2Δ::LEU2</i>                         |
| SCY 1998                          | <i>dga1Δ::URA3 lro1Δ::LEU2</i>                         |
| SCY 2021                          | <i>dga1Δ::URA3 lro1Δ::URA3 are1Δ::HIS3 are2Δ::LEU2</i> |
| SCY 3035                          | <i>opi3Δ::URA3</i>                                     |
| SCY 3098                          | <i>cho2Δ::LEU2</i>                                     |
| SCY 3104                          | <i>dga1Δ::URA3 lro1Δ::LEU2 opi3Δ::URA3</i>             |
| SCY 3171                          | <i>dga1Δ::URA3 lro1Δ::LEU2 cho2Δ::LEU2</i>             |
| <b>S288C/BY4741 (ATCC 201388)</b> |                                                        |
| SCY 2110                          | normal                                                 |
| <i>get3Δ (yor198cΔ)</i>           | <i>aar4Δ::KANMX</i>                                    |
| <i>bfr1Δ (yor198cΔ)</i>           | <i>bfr1Δ::KANMX</i>                                    |
| <i>cho2Δ (ygr157wΔ)</i>           | <i>cho2Δ::KANMX</i>                                    |
| <i>hsd1Δ (yor311cΔ)</i>           | <i>hsd1Δ::KANMX</i>                                    |
| <i>ice2Δ (yil090wΔ)</i>           | <i>ice2Δ::KANMX</i>                                    |
| <i>get1Δ (yor198cΔ)</i>           | <i>mdm39Δ::KANMX</i>                                   |
| <i>opi3Δ (yjr073cΔ)</i>           | <i>opi3Δ::KANMX</i>                                    |
| <i>dop1 (ydr141c)</i>             | <i>dop1</i> (DAmP allele)                              |
| <i>ole1 (ygl055w)</i>             | <i>ole1</i> (DAmP allele)                              |
| <i>get2Δ (yer083cΔ)</i>           | <i>rmd7Δ::KANMX</i>                                    |
| <i>ubx2Δ (yml013wΔ)</i>           | <i>sel1Δ::KANMX</i>                                    |
| <i>sfb2Δ (ynl049cΔ)</i>           | <i>sfb2Δ::KANMX</i>                                    |
| <i>tsc3Δ (ybr058c-aΔ)</i>         | <i>tsc3Δ::KANMX</i>                                    |
| <i>yor285wΔ</i>                   | <i>yor285wΔ::KANMX</i>                                 |
