# Supplementary material
Source: PubMed Central journal article supplement (PMC2781500)
Supplement: supp_M109.050443_jbc.M109.050443-7.pdf [file supp_M109.050443_jbc.M109.050443-7.pdf]

**Supplementary Table S2.** Global gene expression changes compared to normal strains as a result of deleting genes involved in neutral lipid biosynthesis (expressed as a percentage or number of genes changed).

| GO Category                   | <i>are1Δ are2Δ</i> |     | <i>dga1Δ lro1Δ</i> |     | <i>are1Δ are2Δ<br/>dga1Δ lro1Δ</i> |     |
|-------------------------------|--------------------|-----|--------------------|-----|------------------------------------|-----|
|                               | %                  | #   | %                  | #   | %                                  | #   |
| Amino Acid Metabolism         | 1.9                | 2   | 11.8               | 14  | 9.3                                | 10  |
| Carbohydrate Metabolism       | 3.8                | 4   | 5.0                | 6   | 3.7                                | 4   |
| Cell Cycle                    | 1.9                | 2   | 3.4                | 4   | 5.6                                | 6   |
| DNA/RNA Metabolism            | 12.4               | 13  | 5.9                | 7   | 6.5                                | 7   |
| Iron Homeostasis              | 1.9                | 2   | 0.0                | 0   | 1.9                                | 2   |
| Lipid Metabolism              | 4.8                | 5   | 6.7                | 8   | 14.8                               | 16  |
| Protein/Ribosome Metabolism   | 5.7                | 6   | 4.2                | 5   | 4.6                                | 5   |
| Signal Transduction           | 1.0                | 1   | 0.8                | 1   | 3.7                                | 4   |
| Stress Response               | 1.0                | 1   | 3.4                | 4   | 2.8                                | 3   |
| Transcription                 | 5.7                | 6   | 5.9                | 7   | 6.5                                | 7   |
| Transport                     | 17.1               | 18  | 13.4               | 16  | 12.0                               | 13  |
| Unknown                       | 42.9               | 45  | 39.5               | 47  | 28.7                               | 31  |
| Total Number of Genes Changed | 100%               | 105 | 100%               | 119 | 100%                               | 108 |
