# Supplementary material
Source: PubMed Central journal article supplement (PMC2781500)
Supplement: supp_M109.050443_jbc.M109.050443-8.pdf [file supp_M109.050443_jbc.M109.050443-8.pdf]

**Supplementary Table S3, S4, S5, and S6 (Excel files).** Transcriptional profiling of yeast strains deficient in neutral lipid synthesis sorted by statistical significance (P-value). Microarray experiments were performed in triplicate on each of the 4 strains (control, *are1Δ are2Δ*, *dga1Δ lro1Δ*, and *are1Δ are2Δ dga1Δ lro1Δ*) and were normalized and averaged. Log<sub>2</sub>-transformed expression values for normal strains were subtracted from mutant strain expression values. This change from control is represented by “M.” A negative value represents a decrease in expression whereas a positive value indicated an increase in expression. Tables S3, S4 and S5 represent transcriptional changes in *are1Δ are2Δ*; *dga1Δ lro1Δ*; or *are1Δ are2Δ dga1Δ lro1Δ* mutants relative to control strains, respectively. Table S6 represents changes in the *are1Δ are2Δ dga1Δ lro1Δ* quadruple mutant relative to control strains, when grown in the presence of 0.01mM oleate.
