# Supplementary material
Source: PubMed Central journal article supplement (PMC2781500)

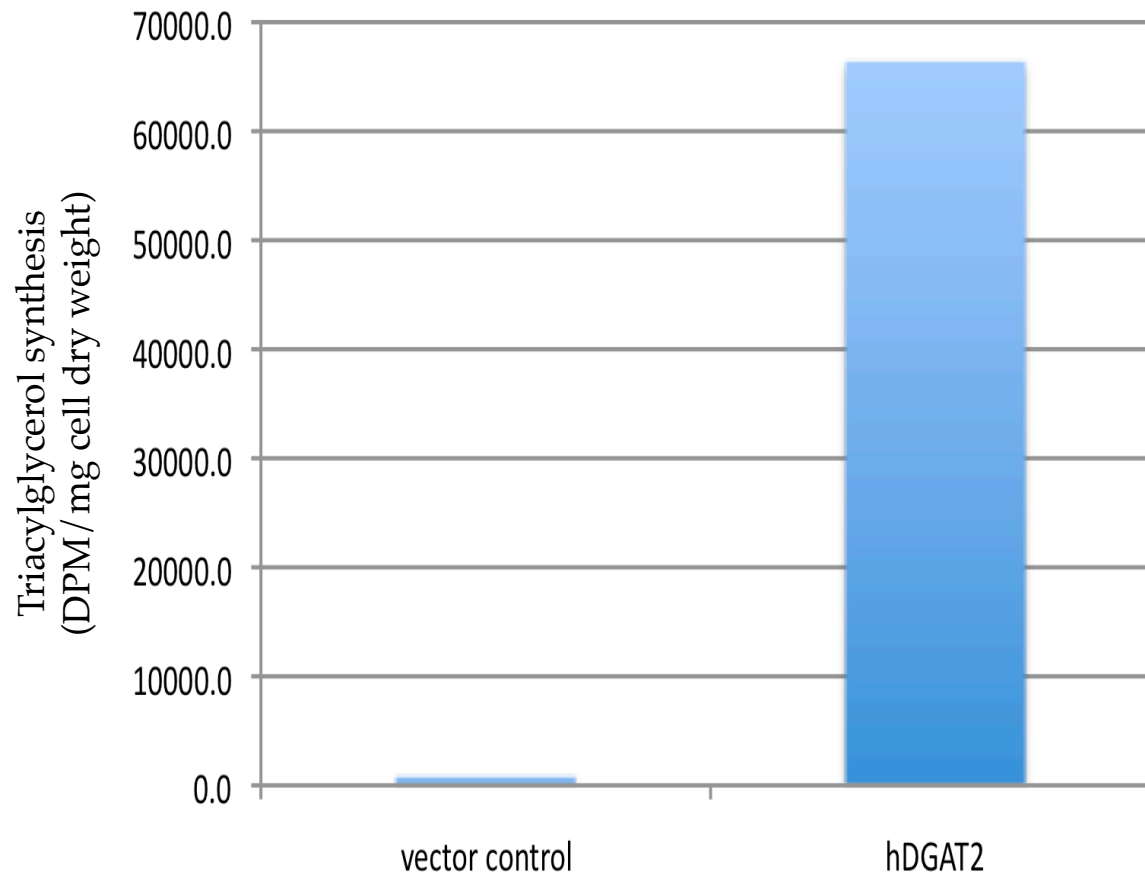

Supplementary Figure S1. Triacylglycerol synthesis by human DGAT2 in yeast.

Supplement: supp_M109.050443_jbc.M109.050443-2.pdf [file supp_M109.050443_jbc.M109.050443-2.pdf]
